# Supplementary material
Source: ML conference proceedings conference paper supplement (https://proceedings.mlr.press/v215/paul23a.html)
Supplement: Supplementary file [file paul23a-supp.pdf]

## Supplementary Material

Our proof for Theorem 20 builds on the following intermediary lemmata. In order not to unnecessarily repeat ourselves in this section, we fix some upper rate operator  $\bar{Q}$  for the remainder. Furthermore, we let

$$D := \{\delta \in \mathbb{R}_{>0} : \delta \|\bar{Q}\| \leq 2\}$$

and for all  $\delta \in D$ , let  $\bar{T}(\delta) := I + \delta\bar{Q}$ ; due to Lemma 12,  $\bar{T}(\delta)$  is an upper transition operator whenever  $\delta \in D$ , and henceforth we will use this fact implicitly.

**Lemma 23** For all  $\delta \in D$ ,  $f, h \in \mathcal{L}$  and  $n \in \mathbb{N}$ ,

$$\|(I + \delta\bar{Q}_f)^n[h]\| \leq n\delta\|f\| + \|h\|. \quad (13)$$

**Proof** Let us prove the result by induction. For the base case  $n = 1$ , it follows from the definition of  $\bar{Q}_f$  and (T7) that

$$\|(I + \delta\bar{Q}_f)[h]\| \leq \|\delta f\| + \|\bar{T}(\delta)[h]\| \leq \delta\|f\| + \|h\|,$$

as required. For the inductive step, we assume that (13) holds for  $n = k$  with  $k \in \mathbb{N}$ , and set out to show that it then also holds for  $n = k + 1$ . From the definition of  $\bar{Q}_f$ , (T7) and the induction hypothesis, it follows immediately that

$$\begin{aligned} \|(I + \delta\bar{Q}_f)^{k+1}[h]\| &\leq \delta\|f\| + \|\bar{T}(\delta)(I + \delta\bar{Q}_f)^k[h]\| \\ &\leq \delta\|f\| + \|(I + \delta\bar{Q}_f)^k[h]\| \\ &\leq \delta(k+1)\|f\| + \|h\|, \end{aligned}$$

as required.  $\blacksquare$

The second intermediary lemma builds on Lemma 23.

**Lemma 24** Fix some  $\delta \in D$  and  $f, h \in \mathcal{L}$ . Then for all  $n \in \mathbb{N}$ ,

$$\|(I + \delta\bar{Q}_f)^n[h] - h\| \leq n\delta c_1 + n^2\delta^2 c_2, \quad (14)$$

with  $c_1 := \|f\| + \|\bar{Q}\|\|h\|$  and  $c_2 := \|\bar{Q}\|\|f\|$ .

**Proof** We again give a proof by induction. For the base case  $n = 1$ , note that

$$\begin{aligned} \|(I + \delta\bar{Q}_f)[h] - h\| &= \|\delta f + h + \delta\bar{Q}[h] - h\| \\ &\leq \delta\|f\| + \delta\|\bar{Q}\|\|h\| = \delta c_1, \end{aligned}$$

which implies the inequality in the statement for  $n = 1$ .

For the inductive step, we assume that (14) holds for  $n = k$  with  $k \in \mathbb{N}$ , and set out to verify that it holds for  $n = k + 1$  as well. Observe that

$$(I + \delta\bar{Q}_f)^{k+1}[h] - h$$

$$= \delta f + (I + \delta\bar{Q}_f)^k[h] - h + \delta\bar{Q}(I + \delta\bar{Q}_f)^k[h].$$

Recall from (R5) that

$$\|\delta\bar{Q}(I + \delta\bar{Q}_f)^k[h]\| \leq \delta\|\bar{Q}\|\|(I + \delta\bar{Q}_f)^k[h]\|.$$

We infer from these two observations, the induction hypothesis and Lemma 23 that

$$\begin{aligned} \|(I + \delta\bar{Q}_f)^{k+1}[h] - h\| &\leq \delta\|f\| + (k\delta c_1 + k^2\delta^2 c_2) + \delta\|\bar{Q}\|(k\delta\|f\| + \|h\|) \\ &= (k+1)\delta c_1 + k^2\delta^2 c_2 + k\delta^2 c_2. \end{aligned}$$

Since  $k^2 + k \leq (k+1)^2$ , we infer from this that

$$\|(I + \delta\bar{Q}_f)^{k+1}[h] - h\| \leq (k+1)\delta c_1 + (k+1)^2\delta^2 c_2,$$

which is the inequality we were after.  $\blacksquare$

Our next step is to use Lemma 24 to prove a ‘generalisation’ of Lemma E.5 in [14]. In this result, we need the fact that  $\bar{Q}$  is Lipschitz:

$$\text{R7. } \|\bar{Q}[f] - \bar{Q}[g]\| \leq \|\bar{Q}\|\|f - g\| \text{ for all } f, g \in \mathcal{L};$$

this is trivial if  $\|\bar{Q}\| = 0$  and follows from Lemma 12 (with  $\Delta = 2/\|\bar{Q}\|$ ) and (T8) (for  $I + \Delta\bar{Q}$ ) otherwise, see also [4, R11] or [7, LR8].

**Lemma 25** Fix some  $\delta \in D$  and  $f, h \in \mathcal{L}$ . Then for all  $n \in \mathbb{N}$ ,

$$\|(I + \delta\bar{Q}_f)^n[h] - (I + n\delta\bar{Q}_f)[h]\| \leq n^2\delta^2 c_3 + n^3\delta^3 c_4,$$

with  $c_3 := \|\bar{Q}\|\|f\| + \|\bar{Q}\|^2\|h\|$  and  $c_4 := \|\bar{Q}\|^2\|f\|$ .

**Proof** Our proof will be one by induction. The base case  $n = 1$  is trivially satisfied. For the inductive step, we assume that the inequality in the statement holds for  $n = k$  with  $k \in \mathbb{N}$ . To prove that the inequality in the statement holds for  $n = k + 1$ , we observe that

$$\begin{aligned} (I + \delta\bar{Q}_f)^{k+1}[h] - (I + (k+1)\delta\bar{Q}_f)[h] &= \delta f + (I + \delta\bar{Q}_f)^k[h] - (I + k\delta\bar{Q}_f)[h] \\ &\quad - \delta f - \delta\bar{Q}[h] + \delta\bar{Q}(I + \delta\bar{Q}_f)^k[h]. \end{aligned}$$

It follows from this, the induction hypothesis, (R7) and Lemma 24 that

$$\begin{aligned} \|(I + \delta\bar{Q}_f)^{k+1}[h] - (I + (k+1)\delta\bar{Q}_f)[h]\| &\leq (k^2\delta^2 c_3 + k^3\delta^3 c_4) \\ &\quad + \delta\|\bar{Q}\|\|(I + \delta\bar{Q}_f)^k[h] - h\| \\ &\leq (k^2\delta^2 c_3 + k^3\delta^3 c_4) + \delta\|\bar{Q}\|(k\delta c_1 + k^2\delta^2 c_2) \\ &= (k^2 + k)\delta^2 c_3 + (k^3 + k^2)\delta^3 c_4 \end{aligned}$$

$$\leq (k+1)^2 \delta^2 c_3 + (k+1)^3 \delta^3 c_4,$$

which is the inequality we were after.  $\blacksquare$

As a final intermediary step, we generalise Lemma 25; this result is to Lemma 25 what Lemma E.6 is to Lemma E.5 in [14].

**Lemma 26** Fix some  $\delta \in D$ ,  $f, h \in \mathcal{L}$  and  $k \in \mathbb{N}$ . Then for all  $n \in \mathbb{N}$ ,

$$\left\| \left( I + \frac{\delta}{k} \bar{Q}_f \right)^{nk} [h] - (I + \delta \bar{Q}_f)^n [h] \right\| \leq n \delta^2 c_3 + n^2 \delta^3 c_4,$$

with  $c_3$  and  $c_4$  as in Lemma 25.

**Proof** Let us prove the result by induction. For the base case  $n = 1$ , we apply Lemma 25 (with  $\delta/k \in D$  here as  $\delta$  there and  $k$  here as  $n$  there) to find that

$$\begin{aligned} \left\| \left( I + \frac{\delta}{k} \bar{Q}_f \right)^k [h] - \left( I + k \frac{\delta}{k} \bar{Q}_f \right) [h] \right\| \\ \leq k^2 \left( \frac{\delta}{k} \right)^2 c_3 + k^3 \left( \frac{\delta}{k} \right)^3 c_4 = \delta^2 c_3 + \delta^3 c_4. \end{aligned}$$

For the inductive step, we assume that the inequality in the statement holds for  $n = \ell$  with  $\ell \in \mathbb{N}$ , and set out to establish the inequality in the statement for  $n = \ell + 1$ . Observe that

$$\begin{aligned} \left( I + \frac{\delta}{k} \bar{Q}_f \right)^{(\ell+1)k} [h] - (I + \delta \bar{Q}_f)^{\ell+1} [h] \\ = \left( I + \frac{\delta}{k} \bar{Q}_f \right)^k \left( I + \frac{\delta}{k} \bar{Q}_f \right)^{\ell k} [h] \\ - \left( I + \frac{\delta}{k} \bar{Q}_f \right)^k (I + \delta \bar{Q}_f)^\ell [h] \\ + \left( I + \frac{\delta}{k} \bar{Q}_f \right)^k (I + \delta \bar{Q}_f)^\ell [h] \\ - (I + \delta \bar{Q}_f) (I + \delta \bar{Q}_f)^\ell [h]. \end{aligned}$$

Let us denote the norm of the first two terms on the right hand side by  $\eta_{1:2}$  and that of the last two terms by  $\eta_{3:4}$ , such that

$$\left\| \left( I + \frac{\delta}{k} \bar{Q}_f \right)^{(\ell+1)k} [h] - (I + \delta \bar{Q}_f)^{\ell+1} [h] \right\| \leq \eta_{1:2} + \eta_{3:4}.$$

Since  $\bar{T}(\delta/k)$  satisfies (T8) because  $\delta/k \in D$ , the same is true for  $\bar{T}(\delta/k)_{\delta f/k}$  – we leave this for the reader to check – and therefore also for  $\bar{T}(\delta/k)_{\delta f/k}^k = \left( I + \frac{\delta}{k} \bar{Q}_f \right)^k$ ; consequently,

$$\eta_{1:2} \leq \left\| \left( I + \frac{\delta}{k} \bar{Q}_f \right)^{\ell k} [h] - (I + \delta \bar{Q}_f)^\ell [h] \right\|$$

$$\leq \ell \delta^2 c_3 + \ell^2 \delta^3 c_4,$$

where the second inequality is exactly the induction hypothesis. Moreover, it follows from Lemma 25 (with  $(I + \delta \bar{Q}_f)^\ell [h]$  here as  $h$  there,  $k$  here as  $n$  there and  $\delta/k \in D$  here as  $\delta$  there) and Lemma 23 (with  $\ell$  here as  $n$  there) that

$$\begin{aligned} \eta_{3:4} &\leq \delta^2 (\|\bar{Q}\| \|f\| + \|\bar{Q}\|^2 \| (I + \delta \bar{Q}_f)^\ell [h] \|) + \delta^3 c_4 \\ &\leq \delta^2 (\|\bar{Q}\| \|f\| + \|\bar{Q}\|^2 \ell \delta \|f\| + \|\bar{Q}\|^2 \|h\|) + \delta^3 c_4 \\ &= \delta^2 c_3 + \ell \delta^3 c_4 + \delta^3 c_4. \end{aligned}$$

Combining our observations, we find that

$$\begin{aligned} \left\| \left( I + \frac{\delta}{k} \bar{Q}_f \right)^{(\ell+1)k} [h] - (I + \delta \bar{Q}_f)^{\ell+1} [h] \right\| \\ \leq \ell \delta^2 c_3 + \ell^2 \delta^3 c_4 + \delta^2 c_3 + \ell \delta^3 c_4 + \delta^3 c_4 \\ = (\ell + 1) \delta^2 c_3 + (\ell^2 + \ell + 1) \delta^3 c_4 \\ \leq (\ell + 1) \delta^2 c_3 + (\ell + 1)^2 \delta^3 c_4, \end{aligned}$$

which is the inequality we were after.  $\blacksquare$

Proving Theorem 20 is now simply a matter of combining (6) and Lemma 26.

**Proof of Theorem 20** Fix some  $n \in \mathbb{N}$ . Then for all  $k \in \mathbb{N}$

$$\begin{aligned} e^{n\Delta \bar{Q}_f} [h] - \left( I + \frac{\Delta}{n^2} \bar{Q}_f \right)^{n^3} [h] \\ = e^{n\Delta \bar{Q}_f} [h] - \left( I + \frac{n\Delta}{kn^3} \bar{Q}_f \right)^{kn^3} [h] \\ + \left( I + \frac{n\Delta}{kn^3} \bar{Q}_f \right)^{kn^3} [h] - \left( I + \frac{\Delta}{n^2} \bar{Q}_f \right)^{n^3} [h] \end{aligned}$$

From (6) with  $t = \Delta n$ , we know that

$$\begin{aligned} e^{n\Delta \bar{Q}_f} [h] &= \lim_{k \rightarrow +\infty} \left( I + \frac{n\Delta}{k} \bar{Q}_f \right)^k [h] \\ &= \lim_{k \rightarrow +\infty} \left( I + \frac{n\Delta}{kn^3} \bar{Q}_f \right)^{kn^3} [h]. \end{aligned}$$

Furthermore, if  $\Delta \|\bar{Q}\| \leq 2n^2$ , it follows from Lemma 26 (with  $\delta = \Delta/n^2$  and  $n^3$  here as  $n$  there) that for all  $k \in \mathbb{N}$ ,

$$\begin{aligned} \left\| \left( I + \frac{n\Delta}{kn^3} \bar{Q}_f \right)^{kn^3} [h] - \left( I + \frac{\Delta}{n^2} \bar{Q}_f \right)^{n^3} [h] \right\| \\ \leq n^3 \left( \frac{\Delta}{n^2} \right)^2 c_3 + n^6 \left( \frac{\Delta}{n^2} \right)^3 c_4 \\ = \frac{1}{n} \Delta^2 c_3 + \Delta^3 c_4. \end{aligned}$$

Combining the preceding and taking the limit for  $k \rightarrow +\infty$  gives that, for all  $n \in \mathbb{N}$  such that  $\Delta \|\bar{Q}\| \leq 2n^2$ ,

$$\frac{1}{n\Delta} \left\| e^{n\Delta \bar{Q}_f} [h] - \left( I + \frac{\Delta}{n^2} \bar{Q}_f \right)^{n^3} [h] \right\| \leq \frac{1}{n^2} \Delta c_3 + \frac{1}{n} \Delta^2 c_4.$$

The right hand side of this inequality vanishes as  $n \rightarrow +\infty$ , which implies the statement. ■
